# Supplementary material for: Neuropsychiatric Status of Patients With Multiple Sclerosis Across Disease Duration Intervals
Source: Atypon-hosted journal article supplement (doi:10.1176/appi.neuropsych.20220124), 2023-02-14
Supplement: appi.neuropsych.20220124.ds001.pdf [file appi.neuropsych.20220124.ds001.pdf]

**Table S1.** Percentage of participants who demonstrated cognitive impairment stratified by disease duration.

|                                   | <b>Total sample</b>   | <b>0–4 years</b>      | <b>5–10 years</b>     | <b>&gt;10 years</b>   | <b><i>p</i>-value<sup>a</sup></b> |
|-----------------------------------|-----------------------|-----------------------|-----------------------|-----------------------|-----------------------------------|
| <b>Number of participants (N)</b> | N=224                 | N=70                  | N=53                  | N=101                 |                                   |
| <b>Cognitive tests</b>            | <i>Percentage (%)</i> | <i>Percentage (%)</i> | <i>Percentage (%)</i> | <i>Percentage (%)</i> |                                   |
| COWAT                             | 22.8                  | 22.9                  | 18.9                  | 24.8                  | .71                               |
| JOLO                              | 9.0                   | 7.1                   | 5.8                   | 12.1                  | .35                               |
| CVLT-TL                           | 10.7                  | 7.1                   | 9.4                   | 13.9                  | .36                               |
| CVLT-DR                           | 26.0                  | 18.6                  | 24.5                  | 32.0                  | .14                               |
| BVMT-TL                           | 31.5                  | 27.1                  | 30.2                  | 35.4                  | .51                               |
| BVMT-DR                           | 31.5                  | 20.0                  | 20.8                  | 45.5                  | <b>&lt;.01</b>                    |
| SDMT                              | 45.5                  | 31.9                  | 48.1                  | 53.5                  | <b>.02</b>                        |
| PASAT_3sec                        | 45.8                  | 54.4                  | 28.8                  | 48.9                  | <b>.02</b>                        |
| PASAT_2sec                        | 41.2                  | 42.2                  | 30.0                  | 47.1                  | .15                               |
| D-KEFS corsor                     | 5.9                   | 4.3                   | 1.9                   | 9.0                   | .17                               |
| D-KEFS sordesc                    | 5.4                   | 4.3                   | 3.8                   | 7.0                   | .64                               |

<sup>a</sup>Chi-square analyses between the three disease duration groups (0–4 years, 5–10 years, >10 years).

**Table S2.** Comparison of participants with and without EDSS scores and cognitive data.

|                                      | <b>Sample w/o EDSS</b>      |            | <b>Sample with EDSS</b>      |            | <b>p-value</b> |
|--------------------------------------|-----------------------------|------------|------------------------------|------------|----------------|
| <b>Number of participants (N)</b>    | N=149                       |            | N=315                        |            |                |
| <b>Characteristic</b>                | <i>M</i>                    | <i>SD</i>  | <i>M</i>                     | <i>SD</i>  |                |
| Age (years)                          | 48.32                       | 11.83      | 45.48                        | 11.42      | <b>.01</b>     |
|                                      | <i>Percentage (%)</i>       |            | <i>Percentage (%)</i>        |            |                |
| Female                               | 59.06                       |            | 73.65                        |            | <b>&lt;.01</b> |
|                                      | <i>Median</i>               | <i>IQR</i> | <i>Median</i>                | <i>IQR</i> |                |
| EDSS <sup>a</sup>                    | N/A                         | N/A        | 2.5                          | 1.5-3.5    | —              |
| <i>Disease course (RMS vs. PMS)</i>  | <i>Percentage (%)</i>       |            | <i>Percentage (%)</i>        |            | <b>.01</b>     |
| RRMS                                 | 53.02                       |            | 70.16                        |            | —              |
| SPMS                                 | 20.13                       |            | 13.02                        |            | —              |
| PPMS                                 | 9.40                        |            | 8.57                         |            | —              |
| Unspecified                          | 17.45                       |            | 8.25                         |            | —              |
| <i>Any disease-modifying therapy</i> | 51.68                       |            | 61.59                        |            | <b>.04</b>     |
| <i>Any psychotropic treatment</i>    | 67.11                       |            | 65.40                        |            | .72            |
| <i>Any psychotherapy</i>             | 8.72                        |            | 14.92                        |            | .06            |
|                                      | <b>Sample w/o Cog. Data</b> |            | <b>Sample with Cog. Data</b> |            |                |
| <b>Number of participants (N)</b>    | N=240                       |            | N=224                        |            |                |
| <b>Characteristic</b>                | <i>M</i>                    | <i>SD</i>  | <i>M</i>                     | <i>SD</i>  |                |
| Age (years)                          | 48.00                       | 12.59      | 44.67                        | 10.23      | <b>&lt;.01</b> |
|                                      | <i>Percentage (%)</i>       |            | <i>Percentage (%)</i>        |            |                |
| Female                               | 65.83                       |            | 72.32                        |            | .13            |
|                                      | <i>Median</i>               | <i>IQR</i> | <i>Median</i>                | <i>IQR</i> |                |
| EDSS <sup>a</sup>                    | 2.5 <sup>b</sup>            | 1.5 – 4.0  | 2.0 <sup>c</sup>             | 1.5 – 3.4  | .25            |
| <i>Disease course (RMS vs. PMS)</i>  | <i>Percentage (%)</i>       |            | <i>Percentage (%)</i>        |            | <b>&lt;.01</b> |
| RRMS                                 | 55.83                       |            | 74.11                        |            | —              |
| SPMS                                 | 18.75                       |            | 11.61                        |            | —              |
| PPMS                                 | 9.58                        |            | 8.04                         |            | —              |
| Unspecified                          | 15.83                       |            | 6.25                         |            | —              |
| <i>Any disease-modifying therapy</i> | 53.75                       |            | 63.39                        |            | <b>.04</b>     |
| <i>Any psychotropic treatment</i>    | 66.25                       |            | 65.63                        |            | .89            |
| <i>Any psychotherapy</i>             | 11.25                       |            | 14.73                        |            | .26            |

<sup>a</sup>Ordinal measure and thus, data reported with non-parametric statistical measures (median and interquartile range).

<sup>b</sup>Sample size of 147 participants with available EDSS scores.

<sup>c</sup>Sample size of 168 participants with available EDSS scores.
